# Supplementary material
Source: ML conference proceedings conference paper supplement (https://openaccess.thecvf.com/content/CVPR2023/html/Jain_Enhanced_Stable_View_CVPR_2023_paper.html)
Supplement: Supplementary file 2 [file Jain_Enhanced_Stable_View_CVPR_2023_supplemental.zip]

Archive with 2 entries (2 files):
- supplementary/results.mp4
- supplementary/supplementary.pdf
